# Supplementary material
Source: ML conference proceedings conference paper supplement (https://aclanthology.org/D19-5522)
Supplement: Attachment [file appendix.pdf › supplimental_materials/appendix.pdf]

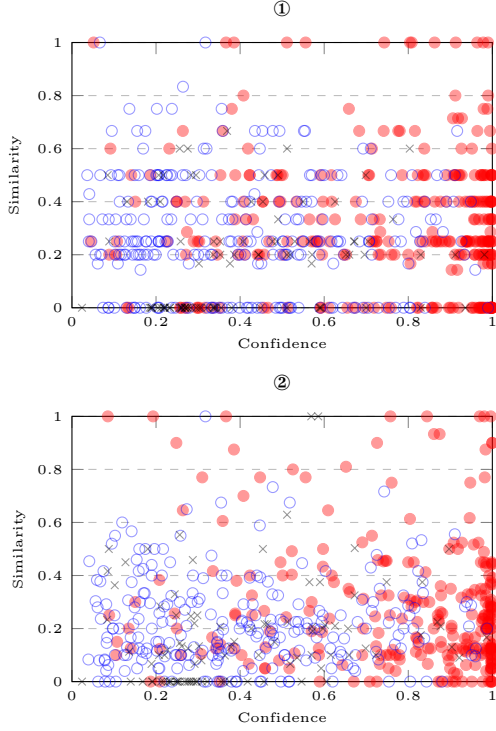

Figure 5: These two plots show the same candidates (also randomly sampled 30% of all candidates) used in Figure 3 except now the y axis is phonological similarity. The computation of phonological similarity for the plot ① deploys only the pronunciation in Mandarin Chinese; whereas plot ② deploys pronunciations in all CJK languages as in FASpell.

## A Preliminary experiments

This appendix is about the preliminary experiments used to justify some settings of FASpell in the main article.

### A.1 Using only one CJK language

The preliminary experiment using only one CJK language (e.g., Mandarin Chinese) in the computation of phonological similarity results in a confidence-similarity graph like the plot ① in Figure 5. As pointed out in the main article, one can observe that the values of such similarity are limited to a few discrete values, which makes it harder to find a smooth filtering curve. Therefore, in FASpell, as shown in the plot ② in Figure 5, all CJK languages are used, which makes the graph resemble those in Figure 3 more.

### A.2 Using tree edit distance

The preliminary experiment using tree edit distance is evaluated on  $Tst_{15}$  following the same

Table 7: The performance of FASpell on  $Tst_{15}$  using tree edit distance.

| Level      | Accuracy (%) | Precision (%) | Recall (%) | F1 (%) |
|------------|--------------|---------------|------------|--------|
| Detection  | 74.4         | 67.6          | 60.4       | 63.8   |
| Correction | 73.7         | 66.2          | 59.1       | 62.4   |

Table 8: The performance of FASpell on  $Tst_{ocr}$  when the masked language model is fine-tuned.

| Level      | Accuracy (%) | Precision (%) | Recall (%) | F1 (%) |
|------------|--------------|---------------|------------|--------|
| Detection  | 14.4         | 73.1          | 14.4       | 24.1   |
| Correction | 13.8         | 70.1          | 13.8       | 23.1   |

configurations in Table 4. As shown in Table 7, the performance is just slightly different from its counterpart in Table 6. Yet, the filtering speed is 32,143 ms/sent in each round, which is much slower than that in Table 5. Therefore, FASpell is configured to use edit distance of strings instead of tree edit distance.

### A.3 Fine-tuning for OCR data

As shown in Table 8, the performance is much worse (in comparison with Table 6) if the masked language model is fine-tuned on  $Trn_{ocr}$  plus 65,900 more sentences harvested from OCR results. Therefore, for formal experiments in the main article, FASpell is configured to use the pre-trained masked language model without any fine-tuning.
